# Supplementary material for: Serum proteins associated with LDL-C and non-HDL-C reduction in response to dietary interventions in the DASH and DASH-Sodium trials
Source: Royal Society of Chemistry journal article supplement (doi:10.1039/d5fo02593a), 2025-01-01
Supplement: d5fo02593a1.pdf [file d5fo02593a1.pdf]

## Supplementary Material

**Title:** Serum proteins associated with LDL-C and non-HDL-C reduction in response to dietary interventions in the DASH and DASH-Sodium trials

**Authors:** Hyunju Kim PhD,<sup>1</sup> Alice H. Lichtenstein PhD,<sup>2</sup> Josef Coresh MD PhD,<sup>3,4</sup> Lawrence J. Appel MD,<sup>4,5,6</sup> Casey M. Rebholz PhD<sup>4,5,6</sup>

<sup>1</sup> Department of Epidemiology, University of Washington School of Public Health, Seattle, Washington

<sup>2</sup> Jean Mayer USDA Human Nutrition Research Center on Aging, Tufts University, Boston, Massachusetts

<sup>3</sup> Department of Population Health, New York University, New York, New York

<sup>4</sup> Department of Epidemiology, Johns Hopkins Bloomberg School of Public Health, Baltimore, Maryland

<sup>5</sup> Welch Center for Prevention, Epidemiology, and Clinical Research, Johns Hopkins University, Baltimore, Maryland

<sup>6</sup> Department of Medicine, Johns Hopkins School of Medicine, Baltimore, Maryland

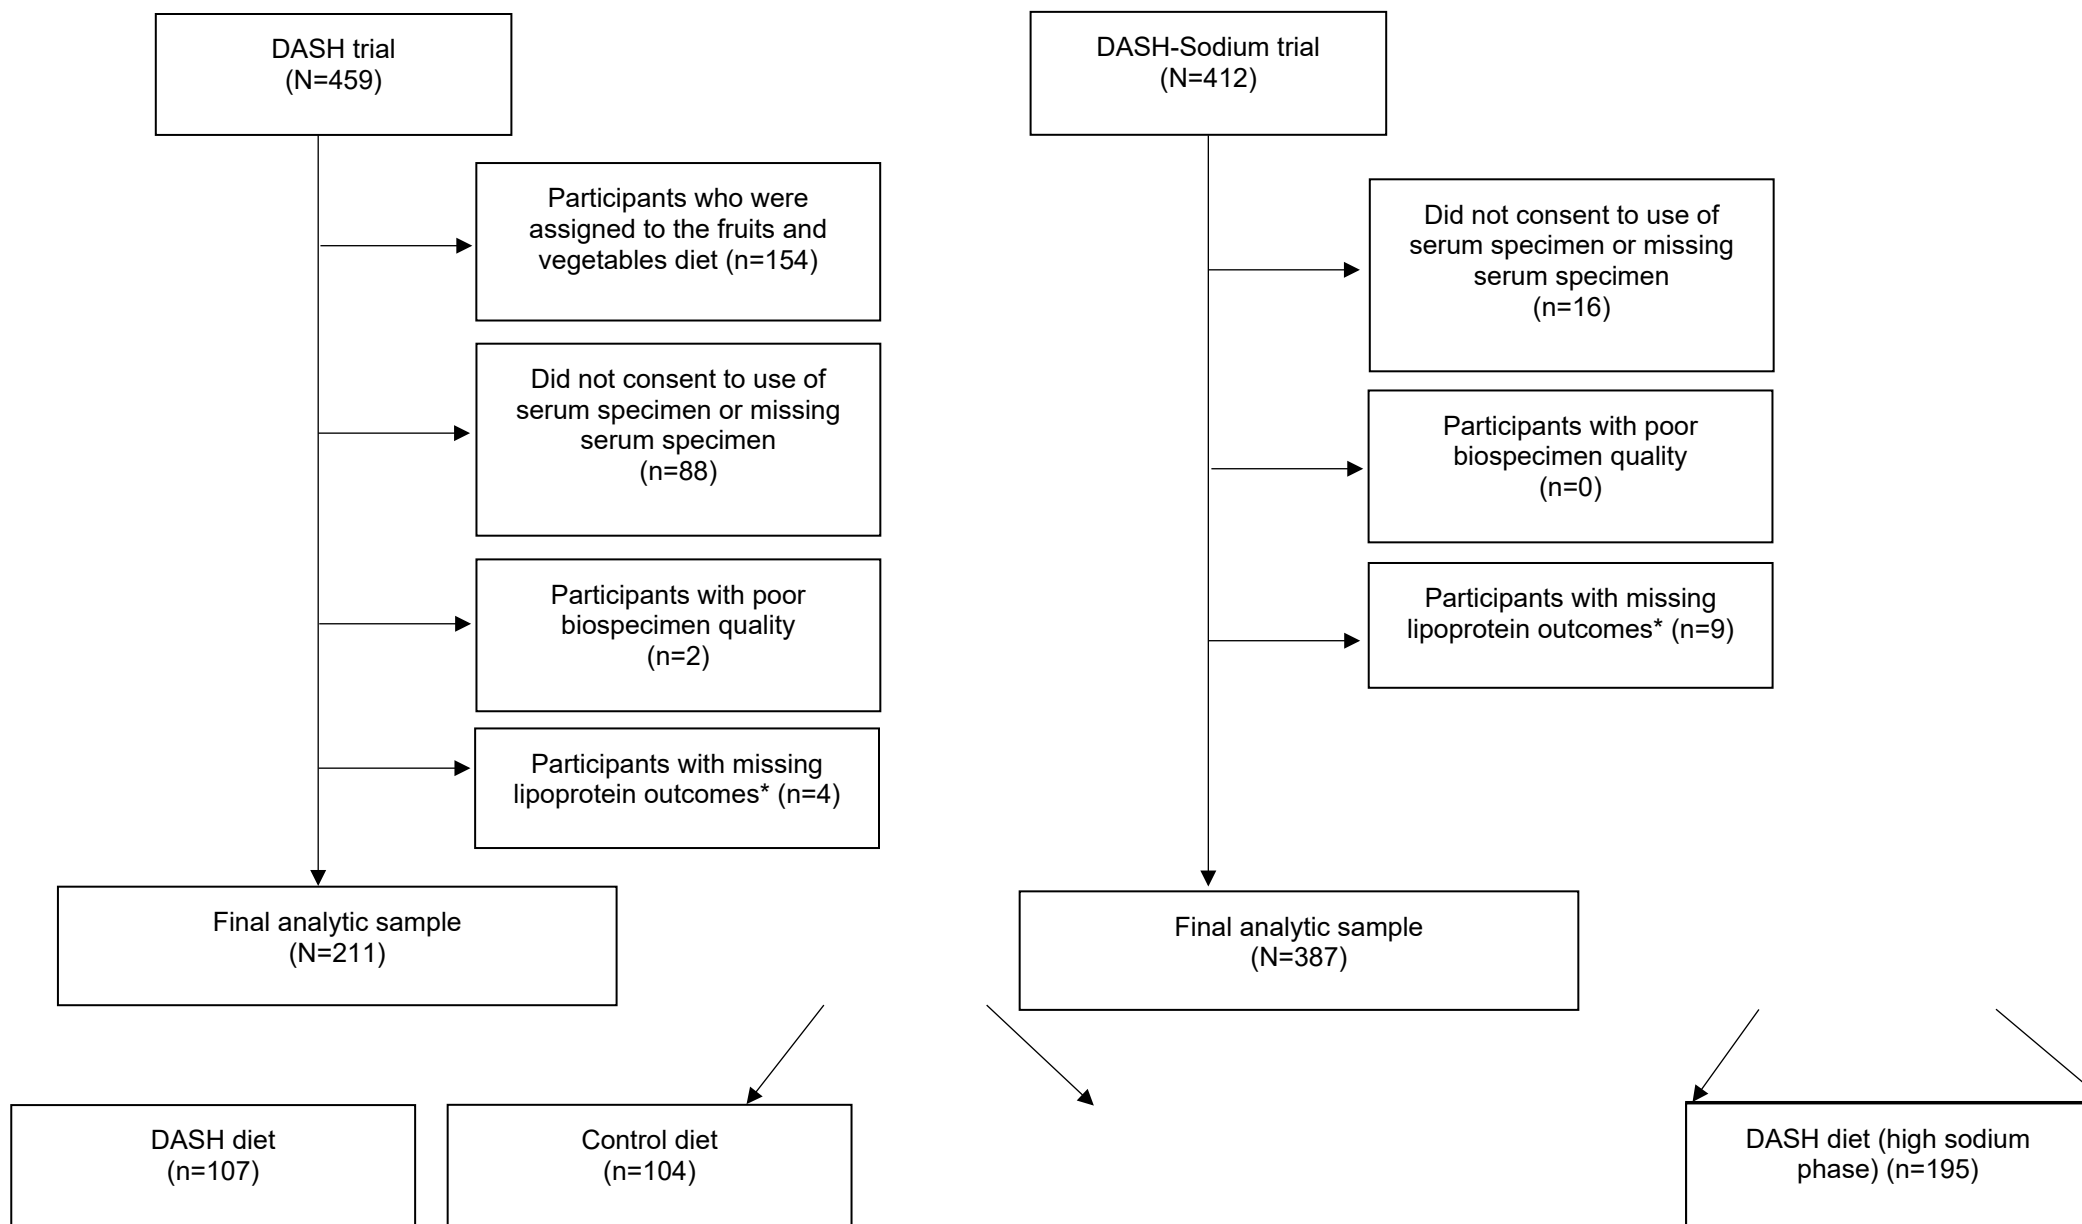

**Supplemental Figure 1. Flow diagram of study participants in the DASH and the DASH-Sodium trials.** \*Lipid outcomes include low-density lipoprotein-cholesterol and non-high-density lipoprotein (HDL)-C levels.

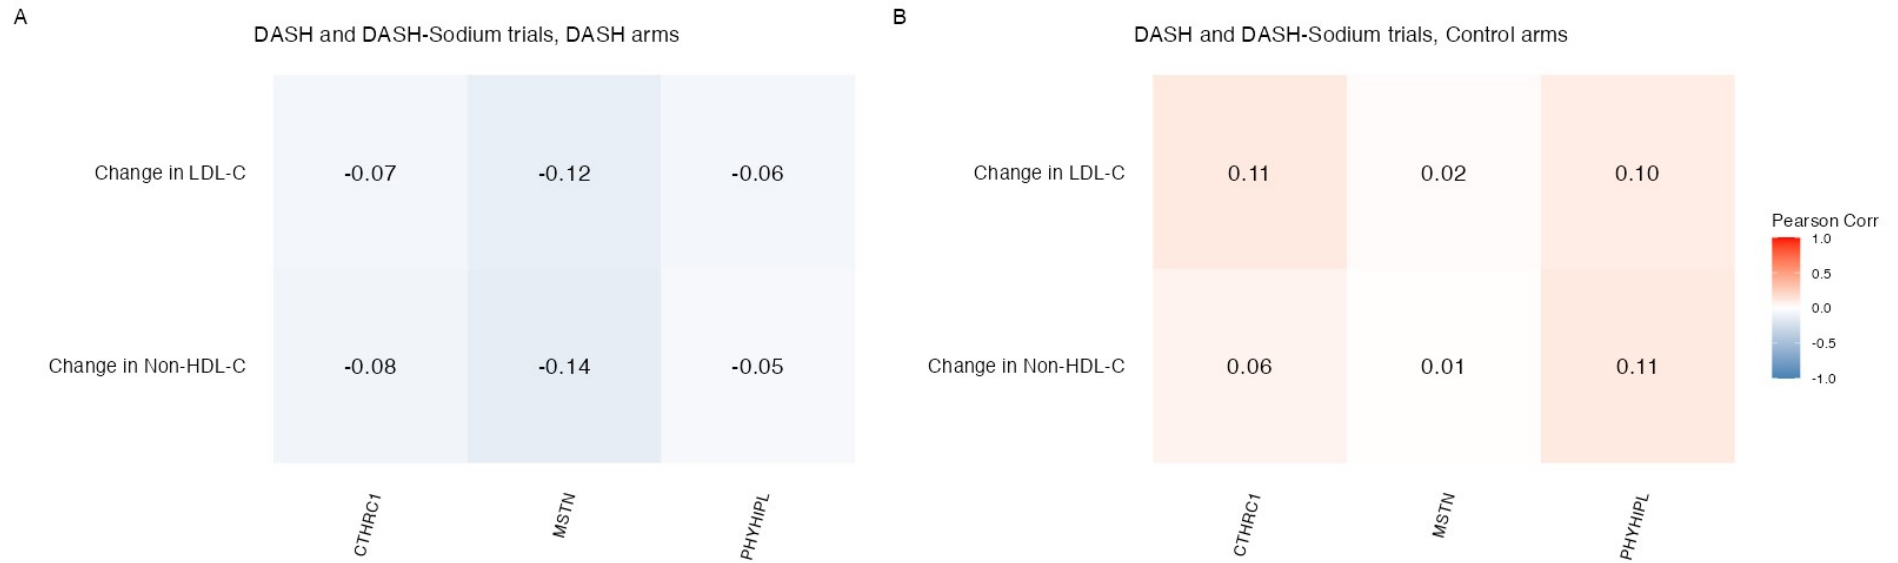

**Supplemental Figure 2.** Correlation matrix for the association between relative abundances of collagen triple helix repeat-containing protein 1 (CTHRC1), growth differentiation factor 8 (MSTN), and phytanoyl-CoA hydroxylase-interacting protein-like (PHYHIPL), measured at the end of the diet interventions (DASH or control diets) and change in low-density lipoprotein (LDL)-cholesterol (C) and non-high-density lipoprotein (HDL)-C from baseline to end-of-study after pooling data the DASH and DASH-Sodium trials. The correlation matrices are stratified by diet interventions (DASH vs. control diets). No covariate was adjusted.

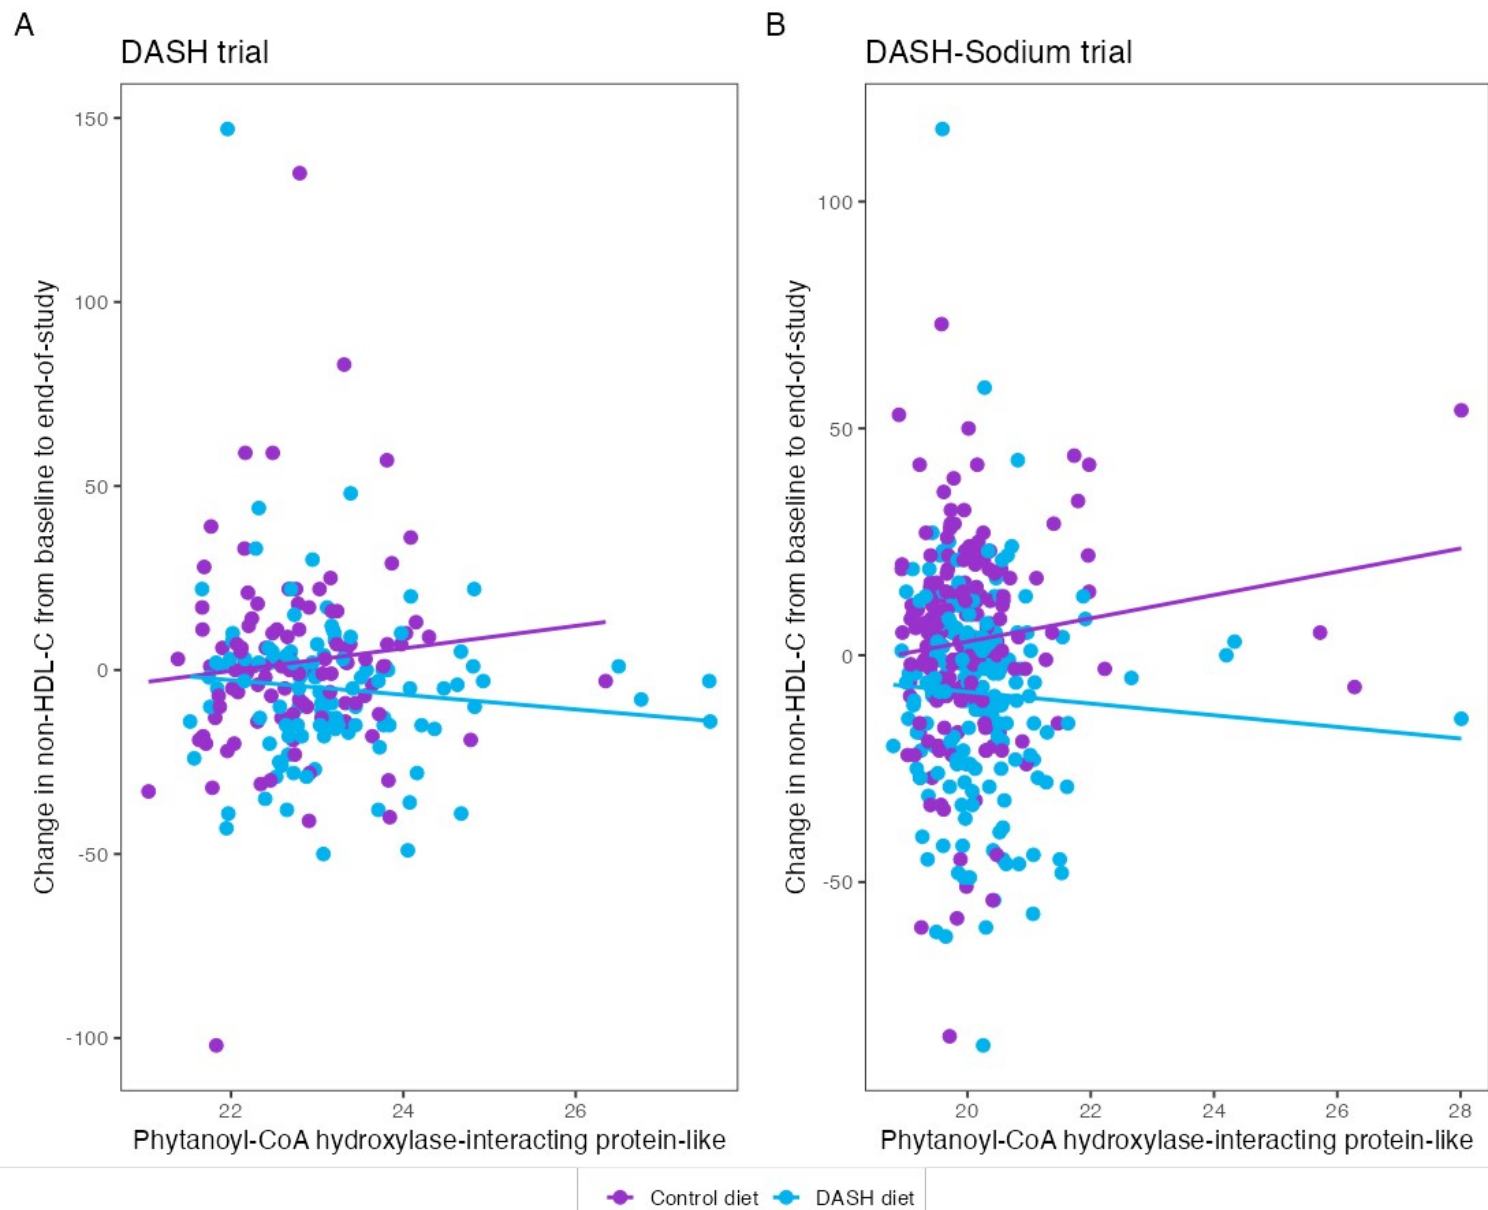

**Supplemental Figure 3.** Scatterplots for the association between relative abundances of phytanoyl-CoA hydroxylase-interacting protein-like (PHYHIPL) measured at the end of the diet interventions (DASH or control diets) and non-high-density lipoprotein (HDL)-cholesterol (C) from baseline to end-of-study, stratified by DASH and DASH-Sodium trials. Trend lines were added to visually describe the association between PHYHIPL and change in non-HDL-C by diet interventions. Covariates were not adjusted.

**Supplemental Table 1.** Associations between DASH diet and non-high-density lipoprotein (HDL)-C levels <sup>1</sup>

|           | Mean (standard deviation) of non-HDL-C |                      |         |                      |                         |         |
|-----------|----------------------------------------|----------------------|---------|----------------------|-------------------------|---------|
|           | DASH (N=305)                           |                      |         | DASH-Sodium (N=412)  |                         |         |
|           | DASH diet (N=151)                      | Control diet (N=154) | P value | DASH-high Na (N=208) | Control-high Na (N=204) | P value |
| Non-HDL-C | -5.98 (21.4)                           | 3.37 (23.6)          | <0.001  | -8.57 (23.3)         | 3.12 (21.1)             | <0.001  |

<sup>1</sup> In the full DASH and DASH-Sodium trial participants, two-way analysis of variance was conducted, adjusting for clinical site as an indicator variable according to intention-to-treat analysis. This analysis method is the same as what was reported in the original trials<sup>1,2</sup>

---

<sup>1</sup> Obarzanek E, Sacks FM, Vollmer WM, Bray GA, Miller ER, Lin PH, Karanja NM, Most-Windhauser MM, Moore TJ, Swain JF, Bales CW, Proschan MA, DASH Research Group. Effects on blood lipids of a blood pressure-lowering diet: the Dietary Approaches to Stop Hypertension (DASH) Trial. *Am J Clin Nutr*. 2001;74:80–89.

<sup>2</sup> Harsha DW, Sacks FM, Obarzanek E, Svetkey LP, Lin P-H, Bray GA, Aickin M, Conlin PR, Miller ER, Appel LJ. Effect of Dietary Sodium Intake on Blood Lipids. *Hypertension*. 2004;43:393–398.

**Supplemental Table 2.** Participant characteristics of the DASH and DASH-Sodium trials, stratified by low-density lipoprotein (LDL)-cholesterol levels<sup>1</sup>

|                                             | DASH trial                        |                                  |         | DASH-Sodium trial                 |                                |         |
|---------------------------------------------|-----------------------------------|----------------------------------|---------|-----------------------------------|--------------------------------|---------|
|                                             | LDL-C<br><130<br>mg/dL<br>(N=126) | LDL-C<br>≥130<br>mg/dL<br>(N=85) | P-value | LDL-C<br><130<br>mg/dL<br>(N=190) | LDL-C ≥130<br>mg/dL<br>(N=197) | P-value |
| Age, %                                      |                                   |                                  | 0.07    |                                   |                                | 0.008   |
| ≤30 y                                       | 17 (13.5%)                        | 9 (10.6%)                        |         | 9 (4.7%)                          | 3 (1.5%)                       |         |
| 31-50 y                                     | 75 (59.5%)                        | 40 (47.1%)                       |         | 121 (63.7%)                       | 105 (53.3%)                    |         |
| ≥51 y                                       | 34 (27.0%)                        | 36 (42.4%)                       |         | 60 (31.6%)                        | 89 (45.2%)                     |         |
| Women, %                                    | 64 (50.8%)                        | 36 (42.4%)                       | 0.29    | 112 (58.9%)                       | 110 (55.8%)                    | 0.61    |
| Race or ethnicity, %                        |                                   |                                  | 0.90    |                                   |                                | 0.99    |
| African American                            | 72 (57.1%)                        | 47 (55.3%)                       |         | 109 (57.4%)                       | 113 (57.4%)                    |         |
| Income, %                                   |                                   |                                  | 0.84    |                                   |                                |         |
| <\$29,999                                   | 42 (33.3%)                        | 27 (31.8%)                       |         | 57 (30.0%)                        | 66 (33.5%)                     | 0.40    |
| \$30,000-\$59,999                           | 58 (46.0%)                        | 36 (42.4%)                       |         | 75 (39.5%)                        | 66 (33.5%)                     |         |
| ≥\$60,000                                   | 26 (20.6%)                        | 20 (23.5%)                       |         | 52 (27.4%)                        | 62 (31.5%)                     |         |
| Not Answered                                | 0 (0%)                            | 2 (2.4%)                         |         | 6 (3.2%)                          | 3 (1.5%)                       |         |
| Education, %                                |                                   |                                  | 0.34    |                                   |                                | 0.37    |
| High school graduate or less                | 18 (14.3%)                        | 13 (15.3%)                       |         | 26 (13.7%)                        | 39 (19.8%)                     |         |
| Some College                                | 43 (34.1%)                        | 34 (40.0%)                       |         | 75 (39.5%)                        | 66 (33.5%)                     |         |
| College graduate                            | 41 (32.5%)                        | 18 (21.2%)                       |         | 45 (23.7%)                        | 45 (22.8%)                     |         |
| Post graduate work/degree                   | 24 (19.0%)                        | 20 (23.5%)                       |         | 44 (23.2%)                        | 46 (23.4%)                     |         |
| Current smoker, %                           | 11 (8.7%)                         | 5 (5.9%)                         | 0.45    | 20 (10.5%)                        | 20 (10.2%)                     | 0.94    |
| Weight (kg)                                 | 81.5 (15.0)                       | 84.5 (14.6)                      | 0.15    | 83.9 (15.2)                       | 84.1 (15.4)                    | 0.87    |
| Height (kg)                                 | 170 (8.73)                        | 172 (9.46)                       | 0.16    | 170 (8.63)                        | 169 (9.74)                     | 0.20    |
| Body mass index, kg/m <sup>2</sup>          | 28.0 (3.92)                       | 28.5 (3.88)                      | 0.33    | 28.9 (4.74)                       | 29.4 (4.79)                    | 0.29    |
| Systolic blood pressure, mm Hg              | 130 (10.8)                        | 131 (10.2)                       | 0.50    | 135 (10.1)                        | 134 (8.96)                     | 0.54    |
| Diastolic blood pressure, mm Hg             | 84.8 (4.84)                       | 84.3 (3.78)                      | 0.37    | 85.5 (4.69)                       | 85.7 (4.29)                    | 0.65    |
| Hypertension, %                             | 63 (50.0%)                        | 33 (38.8%)                       | 0.15    | 92 (48.4%)                        | 83 (42.1%)                     | 0.25    |
| Total cholesterol, mg/dL                    | 170.5 (27.4)                      | 221.4 (21.5)                     | <0.001  | 175.6 (23.2)                      | 225.8 (24.5)                   | <0.001  |
| Low-density lipoprotein-cholesterol, mg/dL  | 99.3 (22.5)                       | 149.0 (16.4)                     | <0.001  | 106.6 (16.7)                      | 155.1 (19.2)                   | <0.001  |
| High-density lipoprotein-cholesterol, mg/dL | 49.5 (16.3)                       | 47.8 (15.6)                      | 0.433   | 49.5 (14.4)                       | 47.9 (11.1)                    | 0.23    |

|                                                 |              |              |        |              |              |        |
|-------------------------------------------------|--------------|--------------|--------|--------------|--------------|--------|
| Non-high-density lipoprotein-cholesterol, mg/dL | 121.0 (26.0) | 174.0 (18.2) | <0.001 | 126.0 (21.7) | 178.0 (23.0) | <0.001 |
| Triacylglycerols, mg/dL                         | 108.4 (56.9) | 121.1 (55.6) | 0.11   | 97.8 (59.0)  | 114.0 (54.9) | 0.005  |

<sup>1</sup> Values are mean (standard deviation) for continuous variables and n (proportions) for categorical variables.

<sup>2</sup> Hypertension was defined as doctor diagnosis of high blood pressure.

**Supplemental Table 2.** Associations between DASH diet-related proteins and change in low-density lipoprotein (LDL)-cholesterol (C) and non-high-density lipoprotein (HDL)-C levels <sup>1</sup>

| UniProt ID             | Entrez gene symbol | Protein name                                       | DASH diets |          | Control diets |          |                   |
|------------------------|--------------------|----------------------------------------------------|------------|----------|---------------|----------|-------------------|
|                        |                    |                                                    | beta       | P value  | beta          | P value  | P for interaction |
| <b>LDL-C (n=2)</b>     |                    |                                                    |            |          |               |          |                   |
| Q96CG8                 | CTHRC1             | Collagen triple helix repeat-containing protein 1  | -1.758     | 1.77E-01 | 3.469         | 1.70E-02 | 0.014             |
| O14793                 | MSTN               | Growth/differentiation factor 8                    | -3.693     | 1.47E-02 | 0.201         | 8.86E-01 | 0.042             |
| <b>non-HDL-C (n=1)</b> |                    |                                                    |            |          |               |          |                   |
| Q96FC7                 | PHYHIPL            | Phytanoyl-CoA hydroxylase-interacting protein-like | -2.029     | 1.40E-01 | 2.777         | 3.79E-02 | 0.049             |

<sup>1</sup> Multivariable linear regression models with cross-product terms between diet and 71 DASH diet-related proteins (per 1-SD higher) were used to identify proteins that were differentially associated by diet interventions (DASH vs. control). Models were performed in each study and by dietary interventions (DASH vs. control), and were adjusted for age, sex, race/ethnicity and measured baseline body mass index (BMI). Meta-analyses using fixed effects models were conducted across the DASH and DASH-Sodium trials. Only the proteins with P for interaction <0.05 are presented.



**Supplemental Table 3.** Proteins selected from elastic net linear regression models to predict change in low-density lipoprotein (LDL)-cholesterol (C) and non-high-density lipoprotein (HDL)-C levels<sup>1</sup>

| UniProt ID             | Entrez gene symbol | Protein name                                         | $\beta$ | P value  |
|------------------------|--------------------|------------------------------------------------------|---------|----------|
| <b>LDL-C (n=3)</b>     |                    |                                                      |         |          |
| Q99536                 | VAT1               | Synaptic vesicle membrane protein VAT-1 homolog      | 4.66    | 1.33E-05 |
| Q9Y279                 | VSIG4              | V-set and immunoglobulin domain-containing protein 4 | -4.14   | 1.20E-04 |
| P04114                 | APOB               | Apolipoprotein B                                     | 4.01    | 2.22E-02 |
| <b>non-HDL-C (n=3)</b> |                    |                                                      |         |          |
| Q99536                 | VAT1               | Synaptic vesicle membrane protein VAT-1 homolog      | 4.81    | 1.41E-05 |
| Q9Y279                 | VSIG4              | V-set and immunoglobulin domain-containing protein 4 | -5.26   | 1.62E-06 |
| P04114                 | APOB               | Apolipoprotein B                                     | 4.86    | 1.16E-05 |

<sup>1</sup> A set of proteins that predict change in LDL-C, total cholesterol, and non-HDL was selected from elastic net regression models. As tuning parameters, lambda.1se (sparsity of the model) and  $\alpha=0.5$  (relative weights of ridge and lasso regression models) were selected. All 71 DASH diet-related proteins were considered for elastic net models.  $\beta$  coefficients and P values represent joint associations between the set of proteins for the change in LDL-C and non-HDL-C. No protein was selected for change in LDL-C or non-HDL-C in the DASH trial.

**Supplemental Table 4.** Associations between DASH diet-related proteins and change in low-density lipoprotein (LDL)-cholesterol (C) and non-high-density lipoprotein (HDL)-C levels, adjusting for corresponding lipids at baseline<sup>1</sup>

| UniProt ID             | Entrez gene symbol | Protein name                                       | DASH diets |          | Control diets |          |                   |
|------------------------|--------------------|----------------------------------------------------|------------|----------|---------------|----------|-------------------|
|                        |                    |                                                    | beta       | P value  | beta          | P value  | P for interaction |
| <b>LDL-C (n=2)</b>     |                    |                                                    |            |          |               |          |                   |
| Q96CG8                 | CTHRC1             | Collagen triple helix repeat-containing protein 1  | -1.758     | 1.77E-01 | 3.469         | 1.70E-02 | 0.066             |
| O14793                 | MSTN               | Growth/differentiation factor 8                    | -3.693     | 1.47E-02 | 0.201         | 8.86E-01 | 0.054             |
| <b>non-HDL-C (n=1)</b> |                    |                                                    |            |          |               |          |                   |
| Q96FC7                 | PHYHIPL            | Phytanoyl-CoA hydroxylase-interacting protein-like | -2.067     | 9.57E-02 | 2.414         | 5.40E-02 | 0.043             |

<sup>1</sup> Multivariable linear regression models with cross-product terms between diet and 71 DASH diet-related proteins (per 1-SD higher) were used to identify proteins that were differentially associated by diet interventions (DASH vs. control). Models were performed in each study and by dietary interventions (DASH vs. control), and were adjusted for age, sex, race/ethnicity, measured baseline body mass index (BMI), and corresponding lipoprotein levels at baseline. Meta-analyses using fixed effects models were conducted across the DASH and DASH-Sodium trials.
